# Supplementary material for: Hepatotoxicities Induced by Neoadjuvant Chemotherapy in Colorectal Cancer Liver Metastases: Distinguishing the True From the False
Source: PubMed Central journal article supplement — Clin Med Insights Oncol. 2019 Jan 22;13:1179554918825450. doi: 10.1177/1179554918825450 (PMC6348554; doi:10.1177/1179554918825450), 2019-01-22
Supplement: Supplementary_Material.pdf [file Supplementary_Material.pdf]

## Supplementary Material

### *S1. Patient selection*

Standard demographic data, history of chemotherapy (type, targeted therapy, duration, time between end of chemotherapy and surgery), and data on colorectal metastatic cancer were documented. Biochemical variables including liver parameters, platelets and hemoglobin were recorded before and after chemotherapy, and after surgery. The aspartate aminotransferase to platelet ratio index (APRI) was calculated before liver resection.

### *S2. Surgical methods*

Surgery characteristics described included the extent of liver resection, combination with intraoperative radiofrequency ablation (IRFA), association with extra hepatic procedures [1]. Postoperative complications were recorded according to Dindo-Clavien system, based on medical and paramedical reports [2]. Grade 3 or higher was considered as a major complication. International Study Group of Liver Surgery (ISGLS) definition for hepatic failure, describing three grades (A to C) based on biological and clinical signs, including transitory hepatic failure (grade A), was used [3]. Postoperative mortality was defined by 90-day mortality [4].

## References

- [1] Evrard S, Poston G, Kissmeyer-Nielsen P, Diallo A, Desolneux G, Brouste V, et al. Combined ablation and resection (CARE) as an effective parenchymal sparing treatment for extensive colorectal liver metastases. *PLoS One* 2014;9(12):e114404.
- [2] Dindo D, Demartines N, Clavien PA. Classification of surgical complications: a new proposal with evaluation in a cohort of 6336 patients and results of a survey. *Ann Surg* 2004;240(2):205-13.
- [3] Rahbari NN, Garden OJ, Padbury R, Brooke-Smith M, Crawford M, Adam R, et al. Posthepatectomy liver failure: a definition and grading by the International Study Group of Liver Surgery (ISGLS). *Surgery* 2011;149(5):713-24.
- [4] Mayo SC, Dhore AD, Nathan H, Edil BH, Hirose K, Anders RA, et al. Refining the definition of perioperative mortality following hepatectomy using death within 90 days as the standard criterion. *HPB (Oxford)* 2011;13(7):473-82.

**Supplementary Table S1: Post-operative complications according to Dindo-Clavien system and details of liver-related complications according to ISGLS score**

| Variable                                        | Number of patients | %    | Number (min – max) |
|-------------------------------------------------|--------------------|------|--------------------|
| <b>Post-operative complications</b>             |                    |      |                    |
| Yes                                             | 78                 | 53.1 |                    |
| No                                              | 69                 | 46.9 |                    |
| Major complications*                            | 29                 | 19.7 |                    |
| <b>Liver-related complications</b>              |                    |      |                    |
| Yes                                             | 31                 | 21.1 |                    |
| No                                              | 116                | 78.9 |                    |
| Hemorrhage                                      | 4                  | 2.7  |                    |
| Biliary complications                           | 13                 | 8.8  |                    |
| Liver failure                                   | 15                 | 10.2 |                    |
| Grade 1                                         | 13                 | 8.8  |                    |
| Grade 2                                         | 2                  | 1.4  |                    |
| Grade 3                                         | 0                  | 0    |                    |
| Hemorrhage + liver failure                      | 1                  | 0.7  |                    |
| <b>Average number of blood transfusion</b>      |                    |      | 1 (0 – 13)         |
| <b>Median duration of hospitalization, days</b> |                    |      | 10 (4 – 47)        |

*\*Major complications: grade  $\geq 3$*

**Supplementary Table S2. Literature review of studies on the impact of chemotherapy on non-tumoural liver and its consequence on post-operative outcomes. The results concerning the impact on chemotherapy on post-operative outcomes are not presented in this table.**

| Reference                   | Hepatic resection (N) | Patients with NCT, (N) | Type of pre-operative chemotherapy (NCT) | Histologic lesions in non tumoral liver                                                | Incidence (%)                                               | Significate risk factor, at multivariate analysis                                  | Post-operative (PO) impact of the histologic lesions |
|-----------------------------|-----------------------|------------------------|------------------------------------------|----------------------------------------------------------------------------------------|-------------------------------------------------------------|------------------------------------------------------------------------------------|------------------------------------------------------|
| <b>Aloia (2006)</b>         | 92                    | 75                     | 5FU or FOLFOX                            | Sinusoidal dilation<br>Peliosis<br>NRH<br>Steatosis                                    | 23 after NCT<br>31 after NCT<br>3 after NCT<br>13 after NCT | NCT<br>NCT<br>NCT                                                                  | More transfusion<br>More transfusion                 |
| <b>Vauthey (2006)</b>       | 406                   | 248                    | 5FU or FOLFOX or FOLFIRI                 | Grade 2 or 3 sinusoidal dilation<br>Steatosis > 30%<br>Steatohepatitis                 | 5.4<br>8.9<br>8.4                                           | Oxaliplatin<br>Irinotecan                                                          | None<br>None<br>PO mortality, liver failure          |
| <b>Pawlik (2007)</b>        | 212                   | 153                    | 5FU and/or FOLFOX and/or FOLFIRI         | CALI score<br>Grade 3 sinusoidal dilation<br>Steatosis>30%<br><br>Steatohepatitis      | 4.6<br>18.3 after NCT<br><br>1.9                            | NCT, diabetes, BMI>30<br>NCT<br>Irinotecan, diabetes, BMI>30                       | None<br>None<br>None<br>None                         |
| <b>Mehta (2007)</b>         | 173                   | 130                    | 5FU and/or FOLFIRI Or FOLFOX             | Grade 2 sinusoidal dilation                                                            | 52.8                                                        | Oxaliplatin                                                                        | None                                                 |
| <b>Brouquet (2009)</b>      | 146                   | 146                    | 5FU and/or FOLFOX and/or FOLFIRI         | CALI score<br><br>Grade 2 or 3 sinusoidal dilation<br>Steatosis>30%<br>Steatohepatitis | 51<br><br>34.2<br>21.9<br>10.3                              | BMI>27, diabetes, interval NCT- Surgery<4 weeks<br>Oxaliplatin<br>BMI>27<br>BMI>27 | PO complications<br><br>None<br>None<br>None         |
| <b>Rubbia-Brandt (2010)</b> | 385                   | 274                    | FOLFOX and/or FOLFIRI                    | Grade 2 or 3 sinusoidal dilation<br>Peliosis<br>Steatosis<br>Steatohepatitis           | 54.3 after NCT<br><br>10.6 after NCT<br>39.8 after          | Oxaliplatin<br><br>Oxaliplatin                                                     | Not evaluated                                        |

|                       |     |     |                                        |                                                                                                |                                                |                                                                           |                                                                                                            |
|-----------------------|-----|-----|----------------------------------------|------------------------------------------------------------------------------------------------|------------------------------------------------|---------------------------------------------------------------------------|------------------------------------------------------------------------------------------------------------|
|                       |     |     |                                        |                                                                                                | NCT<br>0                                       |                                                                           |                                                                                                            |
| <b>Ryan (2010)</b>    | 334 | 132 | 5FU and/or<br>FOLFOX and/or<br>FOLFIRI | Grade 2 or 3 sinusoidal<br>dilation<br>CVI score $\geq$ 3*<br>Steatosis>33%<br>Steatohepatitis | 5.9<br>15.7<br>9.9<br>2.4                      | Oxaliplatin<br>BMI>30<br>BMI>30                                           | None<br>None<br>None<br>None                                                                               |
| <b>Pilgrim (2012)</b> | 232 | 133 | NM*                                    | Sinusoidal dilation<br>Steatosis<br><br>Steatohepatitis                                        | 19<br>18<br><br>4                              | NCT (high grade<br>lesions)<br>Diabetes, BMI>30<br><br>Metabolic syndrome | None<br>PO morbidity, respiratory<br>complications and wound<br>infection<br>None                          |
| <b>Wolf (2013)</b>    | 384 | 250 | FOLFOX and/or<br>FOLFIRI               | Sinusoidal dilation<br>Steatosis<br>Steatohepatitis                                            | 10<br>35<br>4                                  | BMI>25, diabetes,<br>irinotecan                                           | None<br>None<br>None                                                                                       |
| <b>Vigano (2015)</b>  | 478 | 478 | FOLFOX and/or<br>FOLFIRI               | NRH<br>Moderate or severe SOS<br>Steatohepatitis                                               | 18.2<br>38.7<br>10                             | Oxaliplatin                                                               | PO liver failure<br>None<br>None                                                                           |
| <b>Martins (2016)</b> | 140 | 70  | 5FU and/or<br>FOLFOX and/or<br>FOLFIRI | Peliosis<br>Moderate or severe SOS<br>Steatosis<br>Steatohepatitis                             | 25.7 after<br>NCT<br>21.4 after<br>NCT<br>59.3 | NCT<br>NCT<br>Diabetes                                                    | PO morbidity, liver failure<br>PO morbidity, liver failure<br>Reduced PO morbidity<br>Reduced PO morbidity |

*NCT: neoadjuvant chemotherapy*

*NRH: nodular regenerative hyperplasia*

*NM: not mentioned*

*CVI score: combined vascular injury score*
